# Supplementary material for: Enhancing Digital Readiness and Capability in Healthcare: A Systematic Review of Interventions, Barriers, and Facilitators
Source: Research Square preprint supplement (doi:10.21203/rs.3.rs-4816097/v1), 2024-08-28
Supplement: Supplementary file 1 [file bbbb505092402cf85988105b.xlsx]

## Sheet: MMAT checklist
				SCREENING QUESTIONS		1. QUALITATIVE STUDIES					2. RANDOMIZED CONTROLLED TRIALS					3. NON-RANDOMIZED STUDIES					4. QUANTITATIVE DESCRIPTIVE STUDIES					5. MIXED METHODS STUDIES					COMMENTS
RefID	First author	Year	Citation	S1. Are there clear research questions?	S2. Do the collected data allow to address the research questions?	1.1. Is the qualitative approach appropriate to answer the research question?	1.2. Are the qualitative data collection methods adequate to address the research question?	1.3. Are the findings adequately derived from the data?	1.4. Is the interpretation of results sufficiently substantiated by data?	1.5. Is there coherence between qualitative data sources, collection, analysis and interpretation?	2.1. Is randomization appropriately performed?	2.2. Are the groups comparable at baseline?	2.3. Are there complete outcome data?	2.4. Are outcome assessors blinded to the intervention provided?	2.5 Did the participants adhere to the assigned intervention?	3.1. Are the participants representative of the target population?	3.2. Are measurements appropriate regarding both the outcome and intervention (or exposure)?	3.3. Are there complete outcome data?	3.4. Are the confounders accounted for in the design and analysis?	3.5. During the study period, is the intervention administered (or exposure occurred) as intended?	4.1. Is the sampling strategy relevant to address the research question?	4.2. Is the sample representative of the target population?	4.3. Are the measurements appropriate?	4.4. Is the risk of nonresponse bias low?	4.5. Is the statistical analysis appropriate to answer the research question?	5.1. Is there an adequate rationale for using a mixed methods design to address the research question?	5.2. Are the different components of the study effectively integrated to answer the research question?	5.3. Are the outputs of the integration of qualitative and quantitative components adequately interpreted?	5.4. Are divergences and inconsistencies between quantitative and qualitative results adequately addressed?	5.5. Do the different components of the study adhere to the quality criteria of each tradition of the methods involved?
DOI: 10.1097/rnj.0000000000000201	Burridge	2020	Burridge et al., (2020)	Yes	Yes																					Yes	No	Yes	No	Yes	5/7 Moderate
DOI: 10.1097/rnj.0000000000000201	Barnes	2022	Barnes et al., (2022)	No	No	No	No	Yes	Yes	Yes																					3/7 low
https://doi.org/10.1590/1980-220X-REEUSP-2022-0374en	Araújo	2023	Araújo et al., (2023)	Yes	Yes	Yes	Yes	No	Yes	No																					5/7 Moderate
doi: 10.2196/18078	Chang	2020	Chang et al.,2020	Yes	Yes																Yes	Yes	Yes	Yes	Yes						7/ 7 High
doi: 10.2196/34952	Chen	2022	Chen et al.,2022	Yes	Yes																					Yes	Yes	Yes	Yes	Yes	7/7 High
doi:10.7748/nop.2020.e1236	Curtis	2020	Curtis et al.,(2020)	Yes	Yes	Yes	Yes	Yes	Yes	Yes																					7/7 High
doi: 10.2196/24182	Hicks	2021	Hicks et al.,(2021)	Yes	Yes																					Yes	Yes	Yes	Yes	Yes	7/7 High
DOI: 10.3233/SHTI190779	Janssen	2019	Janssen et al.,(2019)	No	Yes	No	Can't tell	Yes	Yes	Can't tell																Yes	Yes	Yes	Yes	Yes	3/7 low
DOI: 10.1080/02770903.2020.1846745	Kan	2022	Kan et al., (2022)	Yes	No	Yes	No	Yes	No	No																					4/7 low
DOI: 10.1016/j.ijmedinf.2017.03.017	Konduri	2017	Konduri et al.,(2017)	No	Yes						No	Yes	Yes	No	No																4/7 Low
doi: 10.2196/33505	Kujala	2022	Kujala et al.,(2022)	Yes	Yes																					No	No	Yes	No	No	4/7 Low
DOI: 10.1111/jan.15963	Hammarén	2023	Hammarén et al.,(2023)	Yes	Yes	Yes	Yes	Yes	Yes	Yes																					7/7 High
DOI:10.1177/18333583231154624	Lloyd,	2023	Lloyd et al.,(2023)	Yes	Yes	Yes	Yes	Yes	Yes	Yes																					7/7 High
doi.org/10.1186/s12913-022-08802-9	May	2022	May et al .,(2022)	Yes	Yes	Yes	Yes	Yes	Yes	Yes																					7/7 High
doi.org/10. 1200/OP.22.00360	Rocque	2022	Rocque et al.,(2022)	Yes	Yes																					Yes	Yes	Yes	Yes	No	7/7 High
doi: 10.2196/15630	Leeuw	2020	Leeuw et al., (2020)	Yes	Yes	Yes	Yes	Yes	Yes	Yes																					7/7 High
doi.org/10.4258/hir.2021.27.4.315	Faujdar	2021	Faujdar, et al., (2021)	Yes	Yes	Yes	Yes	Yes	Yes	Yes																					7/7 High
doi: 10.4103/ijmy.ijmy_235_21	Getachew	2022	Getachew et al.,(2022)	Yes	Yes																					Yes	Yes	No	No	No	4/7 Low
doi.org/10.1080/17538157.2016.1237953	Griebel	2017	Griebel et al., (2017)	Yes	Yes																					Yes	Yes	Yes	No	No	5/7 Moderate
DOI: 10.1080/20469047.2019.1697573	Jensen	2020	Jensen et al., (2020)	Yes	Yes																					Yes	Yes	Yes	Yes	Yes	7/7 High
doi:10.2196/jmir.6900	Lennon	2017	Lennon et al., (2017)	Yes	Yes																					Yes	Yes	Yes	Yes	Yes	7/7 High
http://dx.doi.org/10.2196/38818	Schuetze	2023	Schuetze et al., (2023)	Yes	Yes																					Yes	No	Yes	No	No	4/7 low
doi.org/10.1186/s12913-020-05848-5	Shiferaw	2020	Shiferaw et al., (2020)	Yes	Yes																	Yes	Yes	Yes	Yes						7/7 High
DOI: https://doi.org/10.21203/rs.3.rs-929351/v1	Sidelil	2021	Sidelil et al., (2021)	Yes	Yes						Yes	Yes	Yes	Yes	Yes																7/7 High
doi.org/10.1186/s12911-021-01734-0	Singh	2021	Singh et al., (2021)	Yes	Yes	Yes	Yes	Yes	Yes	Yes																					7/7 High
	Yada	2019	Yada et al., (2019)	Yes	Yes											Yes	Yes	Yes	Yes	No											6/7 Moderate
DOI: 10.1186/s12913-022-08020-3	Verwei	2022	Verweij et al., (2022)	Yes	Yes	Yes	Yes	Yes	Yes	Yes																					7/7 High
10.1093/qjmed/hcz241	Slevin	2021	Slevin et al., (2019)	Yes	Yes	Yes	Yes	Yes	Yes	Yes																					7/7 High
